# Supplementary material for: Meteorins regulate the formation of the left-right organizer and the establishment of vertebrate body asymmetry
Source: eLife. 2025 Aug 1;14:RP105430. doi: 10.7554/eLife.105430 (PMC12316458; doi:10.7554/eLife.105430)
Supplement: Figure 1—figure supplement 1—source data 1. [file elife-105430-fig1-figsupp1-data1.xlsx]

## Sheet: Fig. S1C
age/genotype	2^-dd value	gene
14hpf wt	1.19017	metrn
14hpf wt	1.14229	metrn
14hpf wt	0.95799	metrn
14hpf wt	1.07852	metrn
14hpf wt	0.711912	metrn
14hpf triplMut	0.035111	metrn
14hpf triplMut	0.0452351	metrn
14hpf triplMut	0.0320675	metrn
14hpf triplMut	0.0399377	metrn
14hpf triplMut	0.0486063	metrn
14hpf wt	0.958638	metrnla
14hpf wt	1.18787	metrnla
14hpf wt	0.878163	metrnla
14hpf triplMut	0.513101	metrnla
14hpf triplMut	0.663665	metrnla
14hpf triplMut	0.452269	metrnla
48hpf wt	0.82243	metrnlb
48hpf wt	1.32454	metrnlb
48hpf wt	0.787454	metrnlb
48hpf wt	1.16577	metrnlb
48hpf triplMut	0.802449	metrnlb
48hpf triplMut	0.608022	metrnlb
48hpf triplMut	0.590541	metrnlb
48hpf triplMut	0.634391	metrnlb
