# Supplementary material for: Meteorins regulate the formation of the left-right organizer and the establishment of vertebrate body asymmetry
Source: eLife. 2025 Aug 1;14:RP105430. doi: 10.7554/eLife.105430 (PMC12316458; doi:10.7554/eLife.105430)
Supplement: Figure 2—source data 1. [file elife-105430-fig2-data1.xlsx]

## Sheet: Fig. 2A
age/genotype	2^-dd value	gene
14hpf wt	0.981536	dand5
14hpf wt	0.899115	dand5
14hpf wt	1.24174	dand5
14hpf wt	0.905993	dand5
14hpf wt	1.00721	dand5
14hpf triplMut	0.402505	dand5
14hpf triplMut	0.462044	dand5
14hpf triplMut	0.0774381	dand5
14hpf triplMut	0.473332	dand5
14hpf triplMut	0.450453	dand5
14hpf wt	1.20607	lft1
14hpf wt	1.18126	lft1
14hpf wt	0.803269	lft1
14hpf wt	0.695994	lft1
14hpf wt	1.2555	lft1
14hpf triplMut	0.162013	lft1
14hpf triplMut	0.206541	lft1
14hpf triplMut	0.156837	lft1
14hpf triplMut	0.243223	lft1
14hpf wt	1.16508	lft2
14hpf wt	1.13994	lft2
14hpf wt	0.772313	lft2
14hpf wt	1.14614	lft2
14hpf wt	0.850611	lft2
14hpf triplMut	0.492335	lft2
14hpf triplMut	0.487089	lft2
14hpf triplMut	0.440872	lft2
14hpf triplMut	0.413969	lft2
14hpf triplMut	0.461146	lft2
14hpf wt	0.900561	spaw
14hpf wt	0.826736	spaw
14hpf wt	1.81736	spaw
14hpf wt	1.17227	spaw
14hpf wt	0.630454	spaw
14hpf triplMut	0.367239	spaw
14hpf triplMut	0.477224	spaw
14hpf triplMut	0.625401	spaw
14hpf triplMut	0.224861	spaw
14hpf triplMut	0.0548337	spaw
