# Supplementary material for: Meteorins regulate the formation of the left-right organizer and the establishment of vertebrate body asymmetry
Source: eLife. 2025 Aug 1;14:RP105430. doi: 10.7554/eLife.105430 (PMC12316458; doi:10.7554/eLife.105430)
Supplement: Figure 6—figure supplement 2—source data 1. [file elife-105430-fig6-figsupp2-data1.xlsx]

## Sheet: Fig. S7A
age/genotype	2^-dd value	gene
6hpf wt	0.941989	ItgaV
6hpf wt	1.69814	ItgaV
6hpf wt	0.625146	ItgaV
6hpf triplMut	1.19652	ItgaV
6hpf triplMut	1.58845	ItgaV
6hpf triplMut	0.615988	ItgaV
9hpf wt	1.13345	ItgaV
9hpf wt	0.635759	ItgaV
9hpf wt	1.38773	ItgaV
9hpf triplMut	2.7218	ItgaV
9hpf triplMut	0.931573	ItgaV
9hpf triplMut	1.28981	ItgaV
1dpf wt	0.66127	ItgaV
1dpf wt	0.949997	ItgaV
1dpf wt	1.59184	ItgaV
1dpf triplMut	0.453536	ItgaV
1dpf triplMut	0.9482	ItgaV
1dpf triplMut	1.90666	ItgaV
6hpf wt	1.05348	Itgb1b
6hpf wt	0.651308	Itgb1b
6hpf wt	1.45743	Itgb1b
6hpf triplMut	2.4281	Itgb1b
6hpf triplMut	0.598615	Itgb1b
6hpf triplMut	1.53513	Itgb1b
9hpf wt	0.841461	Itgb1b
9hpf wt	0.756138	Itgb1b
9hpf wt	1.57168	Itgb1b
9hpf triplMut	1.88612	Itgb1b
9hpf triplMut	0.364269	Itgb1b
9hpf triplMut	1.58789	Itgb1b
1dpf wt	1.01374	Itgb1b
1dpf wt	0.583956	Itgb1b
1dpf wt	1.68924	Itgb1b
1dpf triplMut	1.02164	Itgb1b
1dpf triplMut	0.957751	Itgb1b
1dpf triplMut	2.01402	Itgb1b
